# Supplementary material for: Coordination reactions of 2-pyridinecarboxaldehyde-phenylhydrazonatolithium with selected transition metal (Zn, Sn, Fe, Co, Ni and Zr) chlorides and its coupling reaction with dichloromethane
Source: Royal Society of Chemistry journal article supplement (doi:10.1039/c6dt01183g), 2016-01-01
Supplement: c6dt01183g1.pdf [file c6dt01183g1.pdf]

## Supporting Information to the Paper

### Coordination reactions of 2-pyridinecarboxaldehyde-phenylhydrazonolithium with selected transition metal (Zn, Sn, Fe, Co, Ni and Zr) chlorides and its coupling reaction with dichloromethane

Xin-E Duan,<sup>a</sup> Hong-Bo Tong,<sup>b</sup> Xue-Hong Wei,<sup>a</sup> He-Ping Shi,<sup>a</sup> Sheng-Di Bai,<sup>b</sup> Tao Bai,<sup>a</sup> Jing Zhang,<sup>b</sup> Yong-Bin

Zhang<sup>b</sup> and Dian-Sheng Liu<sup>\*b</sup>

<sup>a</sup> School of Chemistry and Chemical Engineering, Shanxi University, Taiyuan 030006, P R China

<sup>b</sup> Institute of Applied Chemistry, Shanxi University, Taiyuan 030006, P R China

\* Corresponding author. Tel: +86-351-7018390. Email: dsliu@sxu.edu.cn

**Table S1** Selected bond lengths (Å) and angles (°) for **1**, **3**, **4** and **7**

| Complexes | <b>1</b>  | <b>3</b>   | <b>4</b>  | <b>7</b>  |            |             |            |
|-----------|-----------|------------|-----------|-----------|------------|-------------|------------|
| M-N1      | 2.028(4)  | 2.0480(17) | 1.993(3)  | Ni1-N1    | 1.968(2)   | Ni1-N4      | 1.978(2)   |
| M-N3      | 1.950(3)  | 1.9825(16) | 1.946(3)  | Ni1-N3    | 1.914(2)   | Ni1-N6      | 1.927(2)   |
| N1-C2     | 1.352(6)  | 1.351(3)   | 1.353(5)  | N1-C2     | 1.361(3)   | N(4)-C(14)  | 1.353(3)   |
| C2-C1     | 1.427(6)  | 1.439(3)   | 1.435(5)  | C2-C1     | 1.439(4)   | C(13)-C(14) | 1.446(4)   |
| C1-N2     | 1.307(6)  | 1.295(3)   | 1.296(5)  | C1-N2     | 1.302(4)   | N(5)-C(13)  | 1.301(3)   |
| N2-N3     | 1.348(5)  | 1.349(2)   | 1.346(4)  | N2-N3     | 1.347(3)   | N(5)-N(6)   | 1.345(3)   |
| N3-C7     | 1.403(5)  | 1.409(3)   | 1.409(4)  | N3-C7     | 1.417(3)   | N(6)-C(19)  | 1.414(3)   |
| N1-C6     | 1.334(6)  | 1.349(3)   | 1.344(5)  | N1-C6     | 1.357(4)   | N(4)-C(18)  | 1.347(3)   |
| C2-C3     | 1.415(6)  | 1.400(3)   | 1.394(5)  | C2-C3     | 1.408(4)   | C(14)-C(15) | 1.401(4)   |
| C3-C4     | 1.368(7)  | 1.366(3)   | 1.356(6)  | C3-C4     | 1.366(4)   | C(15)-C(16) | 1.377(4)   |
| C4-C5     | 1.384(8)  | 1.375(4)   | 1.380(6)  | C4-C5     | 1.395(4)   | C(16)-C(17) | 1.383(5)   |
| C5-C6     | 1.398(7)  | 1.363(3)   | 1.356(6)  | C5-C6     | 1.365(4)   | C(17)-C(18) | 1.373(4)   |
| M-N1-C2   | 122.0(3)  | 124.06(14) | 122.3(2)  | Ni1-N1-C2 | 123.73(19) | Ni1-N4-C14  | 123.49(18) |
| N1-C2-C1  | 122.0(4)  | 120.86(18) | 120.8(3)  | N1-C2-C1  | 121.0(2)   | N4-C14-C13  | 120.8(2)   |
| C2-C1-N2  | 133.0(4)  | 133.50(19) | 133.7(4)  | C2-C1-N2  | 132.0(2)   | C14-C13-N5  | 132.0(2)   |
| C1-N2-N3  | 123.0(4)  | 122.45(17) | 122.7(3)  | C1-N2-N3  | 121.0(2)   | C13-N5-N6   | 120.9(2)   |
| N2-N3-M   | 125.1(3)  | 126.80(13) | 124.4(2)  | N2-N3-Ni1 | 127.95(18) | N5-N6-Ni1   | 127.76(16) |
| N1-M-N3   | 94.84(15) | 92.33(7)   | 95.47(12) | N1-Ni1-N3 | 93.80(9)   | N4-Ni1-N6   | 93.04(9)   |
| N2-N3-C7  | 111.6(3)  | 111.68(15) | 111.5(3)  | N2-N3-C7  | 112.6(2)   | N5-N6-C19   | 111.9(2)   |
| M-N3-C7   | 123.3(3)  | 121.52(12) | 123.9(2)  | Ni1-N3-C7 | 119.38(16) | Ni1-N6-C19  | 120.22(16) |

**Table S2** Selected bond lengths (Å) and angles (°) for **2**

|           |            |            |           |
|-----------|------------|------------|-----------|
| Sn1-N1    | 2.375(3)   | Sn1-N4     | 2.395(3)  |
| Sn1-N3    | 2.186(3)   | Sn1-N6     | 2.207(3)  |
| N1-C2     | 1.354(4)   | N4-C14     | 1.346(4)  |
| C2-C1     | 1.447(5)   | C13-C14    | 1.439(5)  |
| C1-N2     | 1.297(4)   | C13-N5     | 1.306(5)  |
| N2-N3     | 1.354(4)   | N5-N6      | 1.340(4)  |
| N3-C7     | 1.419(5)   | N6-C19     | 1.430(4)  |
| N1-C6     | 1.343(4)   | N4-C18     | 1.343(5)  |
| C2-C3     | 1.401(5)   | C14-C15    | 1.405(5)  |
| C3-C4     | 1.371(5)   | C15-C16    | 1.355(6)  |
| C4-C5     | 1.381(6)   | C16-C17    | 1.374(6)  |
| C5-C6     | 1.378(5)   | C17-C18    | 1.382(6)  |
| Sn1-N1-C2 | 123.11(19) | N1-Sn1-N4  | 148.07(9) |
| N1-C2-C1  | 120.6(3)   | Sn1-N4-C14 | 124.5(2)  |
| C2-C1-N2  | 131.1(3)   | N4-C14-C13 | 121.0(3)  |
| C1-N2-N3  | 120.6(3)   | C14-C13-N5 | 132.1(3)  |
| N2-N3-Sn1 | 127.5(2)   | C13-N5-N6  | 121.9(3)  |
| N1-Sn1-N3 | 75.86(10)  | N5-N6-Sn1  | 128.7(2)  |
| N4-Sn1-N6 | 77.26(10)  | N2-N3-C7   | 112.0(3)  |
| N3-Sn1-N4 | 82.37(10)  | Sn1-N3-C7  | 116.7(2)  |
| N1-Sn1-N6 | 81.61(9)   | N5-N6-C19  | 110.8(3)  |
| N3-Sn1-N6 | 94.94(10)  | Sn1-N6-C19 | 116.8(2)  |

**Table S3** Selected bond lengths (Å) and angles (°) for **5**

|            |            |             |           |
|------------|------------|-------------|-----------|
| Zr1-N6     | 2.322(5)   | Zr2-N3      | 2.325(5)  |
| Zr1-N1     | 2.375(5)   | Zr2-N4      | 2.382(6)  |
| Zr1-N2     | 2.438(5)   | Zr2-N5      | 2.440(5)  |
| Zr1-O2     | 1.932(4)   | Zr2-O4      | 1.936(4)  |
| Zr1-O1     | 1.941(5)   | Zr2-O3      | 1.949(4)  |
| Zr1-O5     | 1.957(4)   | Zr2-O5      | 1.963(4)  |
| N1-C2      | 1.358(9)   | N4-C14      | 1.332(8)  |
| C1-C2      | 1.419(10)  | C13-C14     | 1.442(9)  |
| N2-C1      | 1.313(8)   | N5-C13      | 1.305(8)  |
| N2-N3      | 1.349(7)   | N5-N6       | 1.346(7)  |
| N3-C7      | 1.446(8)   | N6-C19      | 1.441(8)  |
| Zr3-N12    | 2.349(5)   | Zr4-N9      | 2.353(6)  |
| Zr3-N7     | 2.375(6)   | Zr4-N10     | 2.382(5)  |
| Zr3-N8     | 2.437(5)   | Zr4-N11     | 2.429(5)  |
| Zr3-O8     | 1.946(4)   | Zr4-O6      | 1.924(5)  |
| Zr3-O9     | 1.933(4)   | Zr4-O7      | 1.922(5)  |
| Zr3-O10    | 1.960(5)   | Zr4-O10     | 1.961(4)  |
| N7-C42     | 1.357(8)   | N10-C54     | 1.351(9)  |
| C41-C42    | 1.454(10)  | C53-C54     | 1.438(10) |
| N8-C41     | 1.291(9)   | N11-C53     | 1.323(9)  |
| N8-N9      | 1.320(7)   | N11-N12     | 1.324(7)  |
| N9-C47     | 1.432(8)   | N12-C59     | 1.443(8)  |
| N1-Zr1-N2  | 67.22(18)  | N4-Zr2-N5   | 67.17(18) |
| O5-Zr1-N2  | 81.34(18)  | O5-Zr2-N5   | 81.74(17) |
| O1-Zr1-O5  | 110.9(2)   | O3-Zr2-O5   | 111.8(2)  |
| O1-Zr1-N1  | 99.0(2)    | O3-Zr2-N4   | 97.7(2)   |
| O2-Zr1-N6  | 168.2(2)   | O4-Zr2-N3   | 170.1(2)  |
| N2-N3-C7   | 117.1(5)   | N5-N6-C19   | 116.8(5)  |
| N2-N3-Zr2  | 114.8(4)   | N5-N6-Zr1   | 114.6(4)  |
| N7-Zr3-N8  | 83.81(19)  | N10-Zr4-N11 | 67.63(18) |
| O10-Zr3-N8 | 99.06(19)  | O10-Zr4-N11 | 81.99(17) |
| O9-Zr3-O10 | 112.1(2)   | O7-Zr4-O10  | 112.0(2)  |
| O9-Zr3-N7  | 96.8(2)    | O7-Zr4-N10  | 96.3(2)   |
| O8-Zr3-N12 | 168.84(18) | O6-Zr4-N9   | 166.8(2)  |
| N8-N9-C47  | 118.1(5)   | N11-N12-C59 | 118.1(5)  |
| N8-N9-Zr4  | 115.0(3)   | N11-N12-Zr3 | 113.4(4)  |

**Table S4** Selected bond lengths (Å) and angles (°) from X-Ray crystallography and B3LYP calculations for **6**

|           | X-ray    | B3LYP    |            | X-ray    | B3LYP    |
|-----------|----------|----------|------------|----------|----------|
| N2-C1     | 1.293(3) | 1.2998   | N2-N3      | 1.344(3) | 1.3298   |
| C1-C2     | 1.473(4) | 1.4789   | N3-C7      | 1.397(3) | 1.399    |
| N1-C2     | 1.348(3) | 1.3492   | C1-C13     | 1.509(3) | 1.5271   |
| N2-C1-C13 | 124.6(2) | 124.9794 | C2-C1-C13  | 121.0(2) | 119.7043 |
| N2-C1-C2  | 114.4(3) | 115.0978 | C1-N2-N3   | 119.5(3) | 121.2654 |
| N2-N3-C7  | 118.8(3) | 120.153  | C1A-C13-C1 | 117.1(3) | 118.2973 |
| N1-C2-C1  | 117.2(3) | 117.2665 | C8-C7-N3   | 121.9(3) | 122.1844 |
| C3-C2-C1  | 121.6(3) | 121.7238 | C12-C7-N3  | 118.5(3) | 118.4751 |

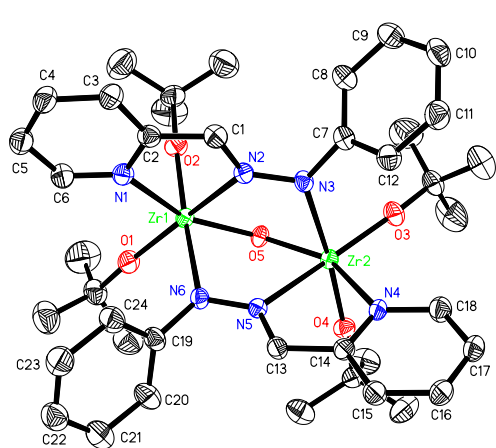

(a)

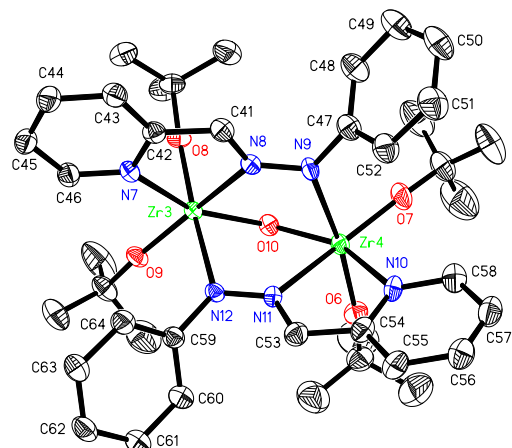

(b)

**Fig. S1** Molecular structure of complex **5** (two similar independent molecules exist in the unit cell, as shown in the (a) and (b), respectively) with thermal ellipsoids drawn at 30% probability level.

Hydrogen atoms are omitted for clarity.

**Table S5** Standard orientation of optimized **6**:

| Center<br>Number | Atomic<br>Number | Atomic<br>Type | Coordinates (Angstroms) |           |           |
|------------------|------------------|----------------|-------------------------|-----------|-----------|
|                  |                  |                | X                       | Y         | Z         |
| 1                | 6                | 0              | -0.000046               | 0.000100  | -1.556004 |
| 2                | 1                | 0              | -0.841512               | -0.258874 | -2.206549 |
| 3                | 1                | 0              | 0.841380                | 0.259076  | -2.206608 |
| 4                | 6                | 0              | 0.375654                | -1.255970 | -0.772908 |
| 5                | 6                | 0              | -0.547861               | -2.410921 | -0.753264 |
| 6                | 6                | 0              | -0.121598               | -3.694656 | -0.353425 |
| 7                | 6                | 0              | -2.668075               | -3.229647 | -1.206741 |
| 8                | 6                | 0              | -1.018333               | -4.750137 | -0.393412 |
| 9                | 1                | 0              | 0.903231                | -3.832140 | -0.034199 |
| 10               | 6                | 0              | -2.325916               | -4.524523 | -0.838417 |
| 11               | 1                | 0              | -3.673737               | -3.000738 | -1.554346 |
| 12               | 1                | 0              | -0.702787               | -5.744887 | -0.092058 |
| 13               | 1                | 0              | -3.054579               | -5.325764 | -0.896511 |
| 14               | 7                | 0              | 1.516665                | -1.452316 | -0.182111 |
| 15               | 7                | 0              | 2.467877                | -0.523017 | -0.191739 |
| 16               | 1                | 0              | 2.317442                | 0.394909  | -0.636184 |
| 17               | 6                | 0              | 3.680174                | -0.751593 | 0.467991  |
| 18               | 6                | 0              | 4.661081                | 0.253182  | 0.433760  |
| 19               | 6                | 0              | 3.943332                | -1.946809 | 1.156079  |
| 20               | 6                | 0              | 5.882820                | 0.060620  | 1.073105  |
| 21               | 1                | 0              | 4.458749                | 1.182504  | -0.089216 |
| 22               | 6                | 0              | 5.170640                | -2.123731 | 1.789093  |
| 23               | 1                | 0              | 3.181941                | -2.715438 | 1.189369  |
| 24               | 6                | 0              | 6.149896                | -1.128146 | 1.754388  |
| 25               | 1                | 0              | 6.630119                | 0.848336  | 1.037510  |
| 26               | 1                | 0              | 5.361663                | -3.053026 | 2.318739  |
| 27               | 1                | 0              | 7.103343                | -1.275595 | 2.251683  |
| 28               | 6                | 0              | -0.375681               | 1.256149  | -0.772847 |
| 29               | 6                | 0              | 0.547891                | 2.411017  | -0.753106 |
| 30               | 6                | 0              | 0.121657                | 3.694825  | -0.353483 |
| 31               | 6                | 0              | 2.668192                | 3.229557  | -1.206505 |
| 32               | 6                | 0              | 1.018464                | 4.750242  | -0.393523 |
| 33               | 1                | 0              | -0.903187               | 3.832433  | -0.034357 |
| 34               | 6                | 0              | 2.326071                | 4.524501  | -0.838375 |
| 35               | 1                | 0              | 3.673882                | 3.000521  | -1.553930 |
| 36               | 1                | 0              | 0.702951                | 5.745050  | -0.092324 |
| 37               | 1                | 0              | 3.054753                | 5.325718  | -0.896549 |
| 38               | 7                | 0              | -1.516691               | 1.452520  | -0.182044 |
| 39               | 7                | 0              | -2.467861               | 0.523199  | -0.191672 |
| 40               | 1                | 0              | -2.317441               | -0.394633 | -0.636242 |

|    |   |   |           |           |           |
|----|---|---|-----------|-----------|-----------|
| 41 | 6 | 0 | -3.680196 | 0.751623  | 0.468037  |
| 42 | 6 | 0 | -3.943505 | 1.946749  | 1.156223  |
| 43 | 6 | 0 | -4.661019 | -0.253234 | 0.433668  |
| 44 | 6 | 0 | -5.170866 | 2.123495  | 1.789185  |
| 45 | 1 | 0 | -3.182200 | 2.715459  | 1.189627  |
| 46 | 6 | 0 | -5.882795 | -0.060862 | 1.072981  |
| 47 | 1 | 0 | -4.458562 | -1.182504 | -0.089362 |
| 48 | 6 | 0 | -6.150023 | 1.127823  | 1.754364  |
| 49 | 1 | 0 | -5.361994 | 3.052736  | 2.318893  |
| 50 | 1 | 0 | -6.629997 | -0.848665 | 1.037291  |
| 51 | 1 | 0 | -7.103485 | 1.275123  | 2.251671  |
| 52 | 7 | 0 | -1.815135 | -2.196095 | -1.163317 |
| 53 | 7 | 0 | 1.815183  | 2.196063  | -1.163050 |

---

**Table S6** Standard orientation of optimized azo isomer **b1**

| Center<br>Number | Atomic<br>Number | Atomic<br>Type | Coordinates (Angstroms) |           |           |
|------------------|------------------|----------------|-------------------------|-----------|-----------|
|                  |                  |                | X                       | Y         | Z         |
| 1                | 6                | 0              | -0.006387               | 0.046199  | 2.530291  |
| 2                | 1                | 0              | -0.755991               | -0.400900 | 3.192750  |
| 3                | 1                | 0              | 0.745826                | 0.524638  | 3.166197  |
| 4                | 6                | 0              | 0.715848                | -1.113691 | 1.804889  |
| 5                | 1                | 0              | 1.083201                | -1.749794 | 2.624111  |
| 6                | 6                | 0              | -0.724117               | 1.177086  | 1.757110  |
| 7                | 1                | 0              | -1.067034               | 1.857190  | 2.549749  |
| 8                | 6                | 0              | -0.154948               | -1.996235 | 0.922290  |
| 9                | 6                | 0              | -0.545947               | -3.265203 | 1.362902  |
| 10               | 6                | 0              | -1.311214               | -2.267758 | -1.046216 |
| 11               | 6                | 0              | -1.360630               | -4.048385 | 0.547246  |
| 12               | 1                | 0              | -0.212663               | -3.632775 | 2.328775  |
| 13               | 6                | 0              | -1.753947               | -3.542261 | -0.688666 |
| 14               | 1                | 0              | -1.597831               | -1.834944 | -2.002553 |
| 15               | 1                | 0              | -1.675585               | -5.036585 | 0.870029  |
| 16               | 1                | 0              | -2.384887               | -4.113467 | -1.361806 |
| 17               | 6                | 0              | 0.163940                | 2.040433  | 0.871379  |
| 18               | 6                | 0              | 0.531176                | 1.673904  | -0.429882 |
| 19               | 6                | 0              | 1.364477                | 2.523385  | -1.150645 |
| 20               | 1                | 0              | 0.175478                | 0.736043  | -0.841390 |
| 21               | 6                | 0              | 1.389832                | 3.981294  | 0.743931  |
| 22               | 6                | 0              | 1.806261                | 3.706818  | -0.556367 |
| 23               | 1                | 0              | 1.667207                | 2.265050  | -2.161434 |
| 24               | 1                | 0              | 1.710583                | 4.892905  | 1.245769  |
| 25               | 1                | 0              | 2.454450                | 4.399030  | -1.084862 |
| 26               | 7                | 0              | 1.963616                | -0.604713 | 1.180110  |
| 27               | 7                | 0              | 2.425395                | -1.360383 | 0.299747  |
| 28               | 7                | 0              | -1.983608               | 0.657253  | 1.177818  |
| 29               | 7                | 0              | -2.409269               | 1.312321  | 0.205030  |
| 30               | 6                | 0              | -3.660888               | 0.859789  | -0.318624 |
| 31               | 6                | 0              | -4.372887               | -0.251102 | 0.159435  |
| 32               | 6                | 0              | -4.167482               | 1.611166  | -1.383944 |
| 33               | 6                | 0              | -5.583785               | -0.595322 | -0.431499 |
| 34               | 1                | 0              | -3.960661               | -0.819227 | 0.985310  |
| 35               | 6                | 0              | -5.383237               | 1.262334  | -1.971575 |
| 36               | 1                | 0              | -3.591216               | 2.463222  | -1.730091 |
| 37               | 6                | 0              | -6.092635               | 0.158858  | -1.496039 |
| 38               | 1                | 0              | -6.138511               | -1.454134 | -0.063937 |
| 39               | 1                | 0              | -5.775220               | 1.849094  | -2.796971 |
| 40               | 1                | 0              | -7.039784               | -0.116280 | -1.951134 |



|    |   |   |           |           |           |
|----|---|---|-----------|-----------|-----------|
| 41 | 6 | 0 | 3.652280  | -0.917584 | -0.282532 |
| 42 | 6 | 0 | 4.259771  | 0.319488  | -0.016246 |
| 43 | 6 | 0 | 4.241225  | -1.810243 | -1.184355 |
| 44 | 6 | 0 | 5.454648  | 0.644248  | -0.649241 |
| 45 | 1 | 0 | 3.780090  | 1.000387  | 0.676863  |
| 46 | 6 | 0 | 5.441658  | -1.480350 | -1.812181 |
| 47 | 1 | 0 | 3.740389  | -2.754226 | -1.374010 |
| 48 | 6 | 0 | 6.049242  | -0.252716 | -1.545139 |
| 49 | 1 | 0 | 5.927729  | 1.601252  | -0.448345 |
| 50 | 1 | 0 | 5.899402  | -2.176336 | -2.508752 |
| 51 | 1 | 0 | 6.982499  | 0.009818  | -2.035028 |
| 52 | 7 | 0 | 0.583286  | 3.176864  | 1.449394  |
| 53 | 7 | 0 | -0.533847 | -1.509180 | -0.268837 |

---

**Table S7** Standard orientation of optimized azo isomer **b2**

| Center<br>Number | Atomic<br>Number | Atomic<br>Type | Coordinates (Angstroms) |           |           |
|------------------|------------------|----------------|-------------------------|-----------|-----------|
|                  |                  |                | X                       | Y         | Z         |
| 1                | 6                | 0              | 0.364136                | 0.883111  | 1.464172  |
| 2                | 1                | 0              | 1.012756                | 1.734206  | 1.694450  |
| 3                | 1                | 0              | 0.432735                | 0.175561  | 2.295339  |
| 4                | 6                | 0              | -1.089510               | 1.402203  | 1.377697  |
| 5                | 1                | 0              | -1.357253               | 1.688836  | 2.405156  |
| 6                | 6                | 0              | 0.922253                | 0.194271  | 0.201786  |
| 7                | 6                | 0              | -1.285032               | 2.629978  | 0.500011  |
| 8                | 6                | 0              | -1.850342               | 3.795382  | 1.030655  |
| 9                | 6                | 0              | -1.059945               | 3.622337  | -1.563528 |
| 10               | 6                | 0              | -2.017284               | 4.908022  | 0.209062  |
| 11               | 1                | 0              | -2.155669               | 3.825265  | 2.072231  |
| 12               | 6                | 0              | -1.615320               | 4.823499  | -1.121846 |
| 13               | 1                | 0              | -0.729761               | 3.516845  | -2.595507 |
| 14               | 1                | 0              | -2.453751               | 5.822152  | 0.601204  |
| 15               | 1                | 0              | -1.724646               | 5.661924  | -1.802131 |
| 16               | 6                | 0              | 0.531274                | -1.268335 | 0.079008  |
| 17               | 6                | 0              | 0.060317                | -1.786246 | -1.132242 |
| 18               | 6                | 0              | -0.252901               | -3.141076 | -1.214288 |
| 19               | 1                | 0              | -0.060233               | -1.132489 | -1.990328 |
| 20               | 6                | 0              | 0.395230                | -3.330933 | 1.079931  |
| 21               | 6                | 0              | -0.079607               | -3.937798 | -0.084267 |
| 22               | 1                | 0              | -0.624982               | -3.565784 | -2.142286 |
| 23               | 1                | 0              | 0.541664                | -3.919643 | 1.984529  |
| 24               | 1                | 0              | -0.307158               | -4.999094 | -0.098231 |
| 25               | 7                | 0              | -1.993204               | 0.260136  | 1.094268  |
| 26               | 7                | 0              | -2.948073               | 0.534546  | 0.337752  |
| 27               | 6                | 0              | -3.837936               | -0.555655 | 0.082671  |
| 28               | 6                | 0              | -3.647636               | -1.866157 | 0.547158  |
| 29               | 6                | 0              | -4.956365               | -0.241386 | -0.696069 |
| 30               | 6                | 0              | -4.583237               | -2.845386 | 0.231758  |
| 31               | 1                | 0              | -2.769510               | -2.090085 | 1.141585  |
| 32               | 6                | 0              | -5.892562               | -1.227279 | -1.006116 |
| 33               | 1                | 0              | -5.069297               | 0.780437  | -1.043980 |
| 34               | 6                | 0              | -5.706791               | -2.530081 | -0.542229 |
| 35               | 1                | 0              | -4.439653               | -3.861760 | 0.587337  |
| 36               | 1                | 0              | -6.761799               | -0.980568 | -1.608411 |
| 37               | 1                | 0              | -6.432404               | -3.301584 | -0.783482 |
| 38               | 7                | 0              | 0.693307                | -2.032165 | 1.170690  |
| 39               | 7                | 0              | -0.896192               | 2.549982  | -0.783388 |
| 40               | 7                | 0              | 2.390310                | 0.442977  | 0.198283  |

|    |   |   |          |           |           |
|----|---|---|----------|-----------|-----------|
| 41 | 7 | 0 | 3.086697 | -0.536467 | -0.136224 |
| 42 | 1 | 0 | 0.556265 | 0.749663  | -0.670475 |
| 43 | 6 | 0 | 4.495295 | -0.282347 | -0.171824 |
| 44 | 6 | 0 | 5.090610 | 0.958579  | 0.100423  |
| 45 | 6 | 0 | 5.290458 | -1.381552 | -0.510100 |
| 46 | 6 | 0 | 6.473723 | 1.085335  | 0.032845  |
| 47 | 1 | 0 | 4.454527 | 1.797204  | 0.359554  |
| 48 | 6 | 0 | 6.677337 | -1.249159 | -0.575670 |
| 49 | 1 | 0 | 4.798150 | -2.326913 | -0.714429 |
| 50 | 6 | 0 | 7.270368 | -0.015765 | -0.304359 |
| 51 | 1 | 0 | 6.938442 | 2.044670  | 0.242633  |
| 52 | 1 | 0 | 7.292386 | -2.105033 | -0.837347 |
| 53 | 1 | 0 | 8.350078 | 0.091747  | -0.354904 |

---

**Table S8** Standard orientation of optimized azo isomer **b3**

| Center<br>Number | Atomic<br>Number | Atomic<br>Type | Coordinates (Angstroms) |           |           |
|------------------|------------------|----------------|-------------------------|-----------|-----------|
|                  |                  |                | X                       | Y         | Z         |
| 1                | 6                | 0              | 0.221911                | -0.020019 | -0.158547 |
| 2                | 1                | 0              | 0.270482                | -0.392917 | -1.186001 |
| 3                | 1                | 0              | 0.272157                | -0.885262 | 0.505505  |
| 4                | 6                | 0              | 1.424836                | 0.899086  | 0.128631  |
| 5                | 6                | 0              | -1.133917               | 0.678185  | 0.050481  |
| 6                | 6                | 0              | 1.573734                | 2.016204  | -0.897933 |
| 7                | 6                | 0              | 2.350998                | 1.848052  | -2.051159 |
| 8                | 6                | 0              | 0.969373                | 4.138105  | -1.545650 |
| 9                | 6                | 0              | 2.426493                | 2.890102  | -2.971356 |
| 10               | 1                | 0              | 2.888340                | 0.920256  | -2.211965 |
| 11               | 6                | 0              | 1.721710                | 4.065825  | -2.716863 |
| 12               | 1                | 0              | 0.403062                | 5.037543  | -1.310329 |
| 13               | 1                | 0              | 3.026739                | 2.786472  | -3.870717 |
| 14               | 1                | 0              | 1.752632                | 4.905466  | -3.403647 |
| 15               | 6                | 0              | -1.430457               | 0.980242  | 1.510491  |
| 16               | 6                | 0              | -1.929306               | 2.228201  | 1.898827  |
| 17               | 6                | 0              | -2.207963               | 2.456737  | 3.244417  |
| 18               | 1                | 0              | -2.082394               | 3.004282  | 1.156051  |
| 19               | 6                | 0              | -1.468728               | 0.224229  | 3.679207  |
| 20               | 6                | 0              | -1.978484               | 1.431260  | 4.159541  |
| 21               | 1                | 0              | -2.593621               | 3.417966  | 3.572129  |
| 22               | 1                | 0              | -1.265889               | -0.597466 | 4.364345  |
| 23               | 1                | 0              | -2.178935               | 1.560994  | 5.218365  |
| 24               | 7                | 0              | -1.196098               | -0.005102 | 2.391322  |
| 25               | 7                | 0              | 0.892248                | 3.146801  | -0.648628 |
| 26               | 7                | 0              | -2.151426               | -0.154122 | -0.645050 |
| 27               | 7                | 0              | -3.196675               | -0.352998 | 0.006547  |
| 28               | 1                | 0              | -1.136130               | 1.622608  | -0.508916 |
| 29               | 6                | 0              | -4.182623               | -1.137508 | -0.673237 |
| 30               | 6                | 0              | -4.029907               | -1.670721 | -1.961976 |
| 31               | 6                | 0              | -5.363392               | -1.359735 | 0.041808  |
| 32               | 6                | 0              | -5.060156               | -2.418772 | -2.520952 |
| 33               | 1                | 0              | -3.105236               | -1.487428 | -2.497188 |
| 34               | 6                | 0              | -6.393947               | -2.110174 | -0.523946 |
| 35               | 1                | 0              | -5.447785               | -0.935503 | 1.037161  |
| 36               | 6                | 0              | -6.243445               | -2.640357 | -1.805676 |
| 37               | 1                | 0              | -4.945664               | -2.833718 | -3.518423 |
| 38               | 1                | 0              | -7.309892               | -2.281191 | 0.033736  |
| 39               | 1                | 0              | -7.043325               | -3.225990 | -2.249587 |
| 40               | 7                | 0              | 2.735775                | 0.225234  | 0.258507  |

|    |   |   |          |           |           |
|----|---|---|----------|-----------|-----------|
| 41 | 7 | 0 | 2.706702 | -1.007801 | 0.060216  |
| 42 | 6 | 0 | 3.969868 | -1.666125 | 0.195897  |
| 43 | 6 | 0 | 3.952240 | -3.044313 | -0.040548 |
| 44 | 6 | 0 | 5.169674 | -1.024648 | 0.539678  |
| 45 | 6 | 0 | 5.128638 | -3.786263 | 0.062081  |
| 46 | 1 | 0 | 3.006875 | -3.509483 | -0.300925 |
| 47 | 6 | 0 | 6.339134 | -1.769815 | 0.640947  |
| 48 | 1 | 0 | 5.158341 | 0.043979  | 0.721216  |
| 49 | 6 | 0 | 6.322618 | -3.149748 | 0.402729  |
| 50 | 1 | 0 | 5.113069 | -4.856317 | -0.121498 |
| 51 | 1 | 0 | 7.270451 | -1.278476 | 0.907847  |
| 52 | 1 | 0 | 7.240644 | -3.724364 | 0.485072  |
| 53 | 1 | 0 | 1.278987 | 1.396287  | 1.096023  |

---
